# Supplementary material
Source: MDPI journal article supplement (https://www.mdpi.com/2673-4133/4/4/45)
Supplement: s1 [file s1]

## Supplementary Material

**Figure S1:** Confusion matrix (or error matrix) for the maximum likelihood classification (per-pixel). Where: Color composition R(4)G(3)B(2); mosaic of reflectance images (path 232; rows 059-060); Landsat 8 sensor (OLI).

| Class                    |     | Validation (Ground Truth) |    |     |    |    |     |    |    |    |     |     |       | Errors (%) |          | Accuracy (%) |      |
|--------------------------|-----|---------------------------|----|-----|----|----|-----|----|----|----|-----|-----|-------|------------|----------|--------------|------|
|                          |     | C1                        | C2 | C3  | C4 | C5 | C6  | C7 | C8 | C9 | C10 | C11 | TOTAL | Commission | Omission | Producer     | User |
| Maximum Likelihood       | C1  | 106                       | 19 | 0   | 0  | 0  | 4   | 0  | 0  | 36 | 0   | 0   | 165   | 35.8       | 11.0     | 89.0         | 64.2 |
|                          | C2  | 12                        | 95 | 2   | 0  | 0  | 2   | 0  | 0  | 7  | 0   | 0   | 118   | 19.5       | 20.2     | 79.8         | 80.5 |
|                          | C3  | 0                         | 2  | 104 | 1  | 6  | 2   | 0  | 1  | 8  | 0   | 2   | 126   | 17.5       | 13.3     | 86.7         | 82.5 |
|                          | C4  | 0                         | 0  | 0   | 79 | 24 | 4   | 1  | 2  | 5  | 0   | 16  | 131   | 39.7       | 34.2     | 65.8         | 60.3 |
|                          | C5  | 0                         | 0  | 0   | 25 | 85 | 0   | 0  | 0  | 1  | 0   | 7   | 118   | 28.0       | 29.2     | 70.8         | 72.0 |
|                          | C6  | 0                         | 0  | 0   | 0  | 0  | 103 | 0  | 1  | 0  | 0   | 0   | 104   | 1.0        | 13.5     | 86.6         | 99.0 |
|                          | C7  | 0                         | 0  | 0   | 0  | 0  | 0   | 81 | 5  | 0  | 0   | 0   | 86    | 5.8        | 32.5     | 67.5         | 94.2 |
|                          | C8  | 0                         | 2  | 0   | 2  | 0  | 2   | 28 | 81 | 1  | 3   | 4   | 123   | 34.2       | 32.5     | 67.5         | 65.9 |
|                          | C9  | 1                         | 1  | 14  | 6  | 0  | 0   | 2  | 1  | 58 | 0   | 13  | 96    | 39.6       | 51.7     | 48.3         | 60.4 |
|                          | C10 | 0                         | 0  | 0   | 0  | 0  | 0   | 2  | 19 | 0  | 117 | 1   | 139   | 15.8       | 2.5      | 97.5         | 84.2 |
| C11                      | 0   | 0                         | 0  | 7   | 5  | 2  | 6   | 10 | 4  | 0  | 77  | 111 | 31.0  | 35.8       | 64.2     | 69.4         |      |
| Overall Accuracy = 75%   |     |                           |    |     |    |    |     |    |    |    |     |     |       |            |          |              |      |
| Kappa Coefficient = 0.72 |     |                           |    |     |    |    |     |    |    |    |     |     |       |            |          |              |      |

**Figure S2:** Confusion matrix (or error matrix) for the maximum likelihood classification (per-pixel). Where: Color composition R(5)G(4)B(3); mosaic of reflectance images (path 232; rows 059-060); Landsat 8 sensor (OLI).

| Class                    |     | Validation (Ground Truth) |    |     |    |    |     |    |    |    |     |     |       | Errors (%) |          | Accuracy (%) |      |
|--------------------------|-----|---------------------------|----|-----|----|----|-----|----|----|----|-----|-----|-------|------------|----------|--------------|------|
|                          |     | C1                        | C2 | C3  | C4 | C5 | C6  | C7 | C8 | C9 | C10 | C11 | TOTAL | Commission | Omission | Producer     | User |
| Maximum Likelihood       | C1  | 98                        | 21 | 0   | 0  | 0  | 3   | 0  | 0  | 29 | 0   | 0   | 151   | 35.1       | 17.7     | 82.4         | 64.9 |
|                          | C2  | 20                        | 97 | 2   | 0  | 0  | 1   | 0  | 0  | 4  | 0   | 0   | 124   | 21.8       | 18.5     | 81.5         | 78.2 |
|                          | C3  | 0                         | 1  | 112 | 1  | 5  | 2   | 0  | 0  | 0  | 0   | 0   | 121   | 7.4        | 6.7      | 93.3         | 92.6 |
|                          | C4  | 0                         | 0  | 1   | 91 | 26 | 1   | 4  | 2  | 0  | 0   | 11  | 136   | 33.1       | 24.2     | 75.8         | 66.9 |
|                          | C5  | 0                         | 0  | 0   | 22 | 83 | 0   | 0  | 0  | 0  | 0   | 6   | 111   | 25.2       | 30.8     | 69.2         | 74.8 |
|                          | C6  | 0                         | 0  | 0   | 0  | 3  | 111 | 0  | 0  | 0  | 0   | 0   | 114   | 2.6        | 6.7      | 93.3         | 97.4 |
|                          | C7  | 0                         | 0  | 0   | 0  | 0  | 0   | 77 | 4  | 0  | 0   | 0   | 81    | 4.9        | 35.8     | 64.2         | 95.1 |
|                          | C8  | 0                         | 0  | 0   | 2  | 0  | 1   | 29 | 73 | 1  | 3   | 3   | 112   | 34.8       | 39.2     | 60.8         | 65.2 |
|                          | C9  | 1                         | 0  | 5   | 0  | 0  | 0   | 1  | 1  | 79 | 0   | 17  | 104   | 24.0       | 34.2     | 65.8         | 76.0 |
|                          | C10 | 0                         | 0  | 0   | 0  | 0  | 0   | 3  | 33 | 0  | 117 | 8   | 161   | 27.3       | 2.5      | 97.5         | 72.7 |
| C11                      | 0   | 0                         | 0  | 4   | 3  | 0  | 6   | 7  | 7  | 0  | 75  | 102 | 26.5  | 37.5       | 62.5     | 73.5         |      |
| Overall Accuracy = 77%   |     |                           |    |     |    |    |     |    |    |    |     |     |       |            |          |              |      |
| Kappa Coefficient = 0.75 |     |                           |    |     |    |    |     |    |    |    |     |     |       |            |          |              |      |

**Figure S3:** Confusion matrix (or error matrix) for the maximum likelihood classification (per-pixel). Where: Color composition R(6)G(5)B(4); mosaic of reflectance images (path 232; rows 059-060); Landsat 8 sensor (OLI).

| Class                    |     | Validation (Ground Truth) |    |     |    |    |     |    |    |    |     |     |       | Errors (%) |          | Accuracy (%) |      |
|--------------------------|-----|---------------------------|----|-----|----|----|-----|----|----|----|-----|-----|-------|------------|----------|--------------|------|
|                          |     | C1                        | C2 | C3  | C4 | C5 | C6  | C7 | C8 | C9 | C10 | C11 | TOTAL | Commission | Omission | Producer     | User |
| Maximum Likelihood       | C1  | 97                        | 30 | 2   | 0  | 0  | 2   | 0  | 0  | 32 | 0   | 0   | 163   | 40.5       | 18.5     | 81.5         | 59.5 |
|                          | C2  | 20                        | 85 | 2   | 0  | 0  | 2   | 0  | 0  | 10 | 0   | 0   | 119   | 28.6       | 28.6     | 71.4         | 71.4 |
|                          | C3  | 1                         | 1  | 103 | 1  | 5  | 1   | 2  | 0  | 3  | 0   | 1   | 118   | 12.7       | 14.2     | 85.8         | 87.3 |
|                          | C4  | 0                         | 0  | 2   | 84 | 35 | 0   | 1  | 1  | 0  | 0   | 17  | 140   | 40.0       | 30.0     | 70.0         | 60.0 |
|                          | C5  | 0                         | 0  | 0   | 21 | 75 | 0   | 0  | 0  | 0  | 0   | 7   | 103   | 27.2       | 37.5     | 62.5         | 72.8 |
|                          | C6  | 0                         | 0  | 0   | 1  | 4  | 112 | 0  | 0  | 0  | 0   | 0   | 117   | 4.3        | 5.9      | 94.1         | 95.7 |
|                          | C7  | 0                         | 0  | 0   | 0  | 0  | 1   | 77 | 8  | 0  | 0   | 0   | 86    | 10.5       | 35.8     | 64.2         | 89.5 |
|                          | C8  | 0                         | 0  | 0   | 1  | 1  | 0   | 33 | 71 | 1  | 4   | 1   | 112   | 36.6       | 40.8     | 59.2         | 63.4 |
|                          | C9  | 1                         | 3  | 11  | 1  | 0  | 1   | 0  | 1  | 74 | 1   | 13  | 106   | 30.2       | 38.3     | 61.7         | 69.8 |
|                          | C10 | 0                         | 0  | 0   | 0  | 0  | 0   | 3  | 31 | 0  | 111 | 10  | 155   | 38.4       | 7.5      | 92.5         | 71.6 |
|                          | C11 | 0                         | 0  | 0   | 0  | 11 | 0   | 0  | 4  | 8  | 0   | 4   | 71    | 98         | 27.6     | 40.8         | 59.2 |
| Overall Accuracy = 73%   |     |                           |    |     |    |    |     |    |    |    |     |     |       |            |          |              |      |
| Kappa Coefficient = 0.70 |     |                           |    |     |    |    |     |    |    |    |     |     |       |            |          |              |      |

**Figure S4:** Confusion matrix (or error matrix) for the GEOBIA. Where: using visible bands (RGB), near and medium infrared bands (NIR, SWIR 1 or MIR), NDVI and NDWI; mosaic of reflectance images (path 232; rows 059-060); Landsat 8 sensor (OLI).

| Class                    |     | Validation (Ground Truth) |    |     |    |    |     |    |    |    |     |     |       | Errors (%) |          | Accuracy (%) |      |
|--------------------------|-----|---------------------------|----|-----|----|----|-----|----|----|----|-----|-----|-------|------------|----------|--------------|------|
|                          |     | C1                        | C2 | C3  | C4 | C5 | C6  | C7 | C8 | C9 | C10 | C11 | TOTAL | Commission | Omission | Producer     | User |
| GEOBIA                   | C1  | 106                       | 31 | 0   | 0  | 0  | 2   | 0  | 0  | 12 | 0   | 0   | 151   | 29.8       | 11.7     | 88.3         | 70.2 |
|                          | C2  | 13                        | 87 | 1   | 0  | 0  | 0   | 0  | 0  | 2  | 0   | 0   | 103   | 15.5       | 27.5     | 72.5         | 84.5 |
|                          | C3  | 0                         | 2  | 111 | 1  | 1  | 0   | 1  | 1  | 6  | 23  | 3   | 149   | 25.5       | 7.5      | 92.5         | 74.5 |
|                          | C4  | 0                         | 0  | 4   | 80 | 18 | 0   | 6  | 12 | 6  | 20  | 37  | 183   | 56.3       | 33.3     | 66.7         | 43.7 |
|                          | C5  | 0                         | 0  | 0   | 32 | 93 | 0   | 0  | 0  | 0  | 0   | 4   | 129   | 27.9       | 22.5     | 77.5         | 72.1 |
|                          | C6  | 0                         | 0  | 0   | 1  | 7  | 104 | 2  | 0  | 0  | 0   | 1   | 115   | 9.6        | 13.3     | 86.7         | 90.4 |
|                          | C7  | 0                         | 0  | 0   | 4  | 1  | 0   | 90 | 8  | 0  | 0   | 10  | 113   | 20.4       | 25.0     | 75.0         | 79.6 |
|                          | C8  | 0                         | 0  | 0   | 0  | 0  | 0   | 20 | 87 | 0  | 0   | 7   | 114   | 23.7       | 27.5     | 72.5         | 76.3 |
|                          | C9  | 1                         | 0  | 2   | 0  | 0  | 5   | 0  | 0  | 94 | 6   | 0   | 108   | 13.0       | 21.7     | 78.3         | 87.0 |
|                          | C10 | 0                         | 0  | 0   | 0  | 0  | 0   | 0  | 12 | 0  | 71  | 1   | 84    | 15.5       | 40.8     | 59.2         | 84.5 |
|                          | C11 | 0                         | 0  | 0   | 0  | 0  | 0   | 1  | 0  | 0  | 0   | 57  | 58    | 1.7        | 52.5     | 47.5         | 98.3 |
| Overall Accuracy = 74%   |     |                           |    |     |    |    |     |    |    |    |     |     |       |            |          |              |      |
| Kappa Coefficient = 0.72 |     |                           |    |     |    |    |     |    |    |    |     |     |       |            |          |              |      |
